# Supplementary material for: Endothelial-Derived APT1-Mediated Macrophage-Endothelial Cell Interactions Participate in the Development of Atherosclerosis by Regulating the Ras/MAPK Signaling Pathway
Source: MDPI journal article supplement (doi:10.3390/life12040551), 2022-04-07
Supplement: s1 [file s1]

# Supplementary Material of Endothelial-Derived APT1-Mediated Macrophage–Endothelial Cell Interactions Participate in the Development of Atherosclerosis by Regulating the Ras/MAPK Signaling Pathway

**Table S2.** Oligonucleotides used in this work.

| Name                           | Sequence (5' → 3')                                        |
|--------------------------------|-----------------------------------------------------------|
| <b>RT-PCR</b>                  |                                                           |
| Hsa/Mus-U6-RT                  | GTCGTATCCAGTGCAGGGTCCGAGGTATTCGCACTGGATACGACAAAA-TATGGAAC |
| Hsa/Mus-miR-138-RT             | TCGTATCCAGTGCAGGGTCCGAGGTGCACTGGATACGACCGGCCTGA           |
| Hsa/Mus-U6-forward             | TGCGGGTGCTCGCTTCGGCAGC                                    |
| Hsa/Mus-miR-138-forward        | TGCGGAGCTGGTGTGTGAATCA                                    |
| Reverse (universal)            | CCAGTGCAGGGTCCGAGGT                                       |
| Hsa-Actin forward              | CGTGACATTAAGGAGAAGCTG                                     |
| Hsa-Actin reverse              | CTAGAAGCATTTCGCGTGGAC                                     |
| Mus-S26F-forward               | TCATTCCGAACATTGTAGAAGCC                                   |
| Mus-S26F-reverse               | AGCTTGACATAGAGCTTGGGAA                                    |
| Hsa-APT1-forward               | CAGAAACTGGCAGGTGTCAC                                      |
| Hsa-APT1-reverse               | GGTCACATTGGCTGGATTCA                                      |
| Mus-APT1-forward               | CAGGCAGCAGAAACCGTAAA                                      |
| Mus-APT1-reverse               | CAGTGACACCAGCCAGTTTC                                      |
| Hsa-VCAM1-forward              | AAAAGCGGAGACAGGAGACA                                      |
| Hsa-VCAM1-reverse              | AAAAGCGGAGACAGGAGACA                                      |
| Hsa-ICAM1-forward              | TCTTCCTCGGCCTTCCCATA                                      |
| Hsa-ICAM1-reverse              | AGGTACCATGGCCCCAAATG                                      |
| Hsa-MMP9-forward               | CTCTGGAGGTTGACGTGAA                                       |
| Hsa-MMP9-reverse               | TCAACTCACTCCGGGAACTC                                      |
| <b>Transfection</b>            |                                                           |
| Hsa-miR-138 mimics-sense       | AGCUGGUGUUGUGAAUVAGGCCG                                   |
| Hsa-miR-138 mimics-antisense   | GCCUGAUUCACAACACCAGCUU                                    |
| Hsa-miR-138 inhibitor          | CGGCCUGAUUCACAACACCAGCU                                   |
| Negative control Sense         | UUCACCGAAAGUGACACGUTT                                     |
| Negative control antisense     | ACGAGACACGUUAGGAGCATT                                     |
| MicroRNA inhibitor N.C         | CAGUACUAUUGUGUCGUACUA                                     |
| <b>Construction of plasmid</b> |                                                           |
| APT1 -3'UTR-Top                | AAACTAGCGGCCGCTAGT CCTTGTGTAGAAGTACACCAGCAT               |

| Name               | Sequence (5' → 3')                                      |
|--------------------|---------------------------------------------------------|
| <b>RT-PCR</b>      |                                                         |
| APT1 -3'UTR-Bottom | CTAGATGCTGGTGTACTTCTACACAAGGACTAGCGGCCGCTAGTTT          |
| APT Sense          | TACCGGACTCAGATCTCGAGCGCCACCATGTGCGGCAA-<br>TAACATGTCAAC |
| APT Antisense      | GATCCCGGGCCCGCGGTACCGTATCAATTGGAGGTAGGAGTTTATC          |

Restriction sites are underlined.
